1 **Title: Leveraging an Online Dashboard to Inform on Infectious Disease Surveillance: A case**  
2 **Study of COVID-19 in Kenya.**

3

4 **Authors:**

5 Mike J. Mwanga<sup>1</sup>, Laura M. Guzman-Rincon<sup>1,2</sup>, Leonard Kingwara<sup>3,4</sup>, Don B. Odhiambo<sup>1</sup>,  
6 Henry Gathuri<sup>1</sup>, Arnold Lambisia<sup>1</sup>, John Morobe Mwita<sup>1</sup>, Edidah Moraa<sup>1</sup>, Bernadette  
7 Kutima<sup>1</sup>, John Gitonga<sup>1</sup>, Daisy Mugo<sup>1</sup>, Charles N. Agoti<sup>1</sup>, James Nyagwange<sup>1</sup>, George  
8 Warimwe<sup>1</sup>, Isabella Oyier<sup>1</sup>, D. James Nokes<sup>1,2</sup>, Ambrose Agweyu<sup>1,5</sup>, E Wangeci Kagucia<sup>1</sup>,  
9 Anthony Etyang<sup>1</sup>, John Kiiru<sup>3,4</sup>, George Githinji<sup>1,6\*</sup>

10

11 \*Corresponding author: [ggithinji@kemri-wellcome.org](mailto:ggithinji@kemri-wellcome.org)

12

13 **Affiliations:**

14 <sup>1</sup>KEMRI-Wellcome Trust Research Program, Kilifi, Kenya

15 <sup>2</sup>School of Life Sciences and Zeeman Institute for Systems Biology and Infectious Disease  
16 Epidemiology Research (SBIDER), University of Warwick, Coventry, UK

17 <sup>3</sup>Ministry of Health, Nairobi, Kenya

18 <sup>4</sup>Kenya National Public Health Institute, Nairobi, Kenya

19 <sup>5</sup>London School of Hygiene and Tropical Medicine, London, United Kingdom

20 <sup>6</sup>Department of Biochemistry and Biotechnology, Pwani University, Kilifi, Kenya

21

22 **Keywords**

23 COVID-19, SARS-CoV-2, genomics, dashboard, dash, python, Kenya

24

25 **Target Journal:** BMC Public Health

26 **Abstract**

27 A multi-pronged approach to combating the COVID-19 pandemic in Kenya resulted in the  
28 formation of multidisciplinary research initiatives including genomic sequencing, syndromic  
29 surveillance, sero-surveillance, vaccination, and mathematical modelling. These initiatives  
30 generated an overwhelming amount of data that posed a challenge to researchers and  
31 public health officials, to effectively manage, analyse and promptly interpret for immediate  
32 pandemic response. As a result, there was demand for a platform to collate and integrate  
33 these datasets with interpretable findings to aid in pandemic management. In response, we  
34 developed a web-based dashboard, and integrated multidisciplinary datasets collected by  
35 the Ministry of Health-Kenya (MoH-K) and other research organizations, to support  
36 surveillance and monitoring of COVID-19 in Kenya. The developed dashboard combines  
37 genomics, epidemiological, seroprevalence, modelling, vaccination, syndromic and  
38 phylogenetic data and provides real-time updates to the public and health sector experts.  
39 The dashboard provides temporal trends of reported COVID-19 cases, fatalities, variants,  
40 and vaccination, in addition to summary reports from multiple cross-sectional  
41 seroprevalence studies and ongoing facility-based inpatient syndromic surveillance from 15  
42 health facilities across Kenya. This is the first detailed interactive dashboard in Kenya that  
43 combines multiple datasets from a disease outbreak to provide valuable insights to  
44 researchers, health policy makers, the media and public not only during pandemic but also  
45 during routine surveillance. This resource is a model for digital platform for infectious  
46 disease surveillance and for informing public health planning and intervention.

47

48 **Dashboard Link**

49 <https://kcd.kemri-wellcome.org/>

50

## 51 Introduction

52 The emergence of the COVID-19 pandemic triggered unprecedented challenges to  
53 governments and the public health sector, especially the need for high-quality, locally  
54 relevant and timely data, important for informed policy and decision-making (1). Various  
55 partnerships had to be formed among public and private institutions including local  
56 governments to collect and collate relevant and urgently needed data for pandemic  
57 management (2). In Kenya, multidisciplinary research initiatives including genomic  
58 sequencing, syndromic surveillance, serosurveillance, vaccination and mathematical  
59 modelling for predictions were established. These initiatives resulted in ever-increasing data  
60 ranging from virus genetic makeup to patterns of disease spread and population immunity.  
61 The wealth of data from multiple disciplines and spanning different time points became  
62 overwhelming not only to scientists but also to policy makers. This, coupled with the fact  
63 that there were limited channels to communicate and report findings from these data to the  
64 public necessitated the need for streamlined approaches to cohesively integrate and  
65 present multidisciplinary data. This led to an increased demand for efforts to implement  
66 innovative technologies and tools to integrate multidisciplinary data and facilitate evidence-  
67 based decision making for effective disease control policies especially during disease  
68 outbreaks. Given these challenges, leveraging information technology solutions such as  
69 dashboards is indispensable to collecting, managing, analysing, and displaying data from  
70 various sources and assisting in decision-makers in making informed decisions and  
71 appropriate interventions.

72

73 Development of integrated online dashboards can significantly improve infectious disease  
74 surveillance by bringing together multiple data sources such as clinical, genomic,  
75 epidemiological, and other complimentary metadata and identify trends which in turn can  
76 provide insights for effective disease intervention and control (3). Dashboards have been  
77 previously used to communicate, manage, and guide responses to outbreaks and epidemics  
78 by providing up-to-date, comprehensive, and interactive visualizations of public health data.  
79 For instance, the Somalia Polio outbreak of 2013-2014 (4) utilized a dashboard as a utility  
80 for monitoring and rapid responses. The ongoing COVID-19 pandemic has provided a rich  
81 environment within which dashboards have proliferated, such as the John Hopkins  
82 University dashboard (5), World Health Organization (WHO) (6), and Africa Centre for

83 Disease Control (7). Such dashboards were effective in providing high level of global trends  
84 used in tracking the progress of the COVID-19 pandemic and facilitating information sharing  
85 among governments, collaborators and healthcare providers.

86

87 We developed a web-based dashboard, and integrated multidisciplinary datasets collected  
88 by the Ministry of Health – Kenya (MoH-K) and other research organizations, to support  
89 COVID-19 disease surveillance aimed at contributing pandemic management and timely  
90 decision-making process. We utilized COVID-19 datasets from multiple surveillance data  
91 streams that were established to enable tracking and monitoring of COVID-19 epidemic. In  
92 addition to the SARS-CoV-2 demographic, spatial, and temporal trends, we incorporated  
93 growth-rate estimations for recently identified lineages using a Bayesian hierarchical model  
94 (8). The model estimates growth rate of selected SARS-CoV-2 lineages and serves as a  
95 warning system on the potential increase in frequency of the variant in Kenya (see  
96 Supplementary file).

97

## 98 **Data and Data Sources**

### 99 **Clinical and epidemiological data.**

100 The COVID-19 clinical, and epidemiological data were collected through a network of sites  
101 that includes both public and private health facilities across the country. Sample associated  
102 metadata are captured using standard case investigation forms provided by MoH-K.  
103 Research organizations and health facilities are mandated to report testing results and  
104 vaccination reports to MoH-K (Figure 1). These reports are also accompanied by patient  
105 demographic and clinical data (date of birth, county of residence, travel history, age, and  
106 medical history, such as other comorbidity infections) which are then collated to make a  
107 country-wide linelist. These data were summarized and visualized within the home and  
108 county panels.

109

### 110 **Vaccination data**

111 Data related to vaccinations, including demographic information, dosage, and county-level  
112 vaccination information, were obtained from the MoH-K online resources. These data is  
113 displayed under the vaccination panel.

114

## 115 **Genomic and modelling data**

116 Dedicated sequencing facilities performed weekly sequencing of SARS-CoV-2 positive  
117 samples and in turn submitted the sequence data to public repositories including GISAID  
118 and GenBank. The submitted sequences included associated sequence metadata such as  
119 location of sample collection, age of patient, date of sample collection and submission,  
120 variant genotype, and submitting lab. These data were leveraged to enable understanding  
121 of countrywide virus diversity and spread; data which is visualized under the variants tab.  
122 The sequence data was also used to infer evolutionary relationships using the Nextstrain  
123 genomics platform (9). Nextstrain hosts a bioinformatics pipeline for phylodynamic analysis  
124 that integrates genomics sequence data with other data types such as geographic,  
125 epidemiologic, and host species. We utilized this interactive visualization platform to track  
126 evolution and spread of SARS-CoV-2 virus in Kenya by integrating the results in  
127 phylogenetics tab. Additionally, the genomic data on circulating variants and lineages was  
128 used in estimating variant growth rates using a novel Bayesian growth rate model (8). The  
129 choice of lineages for the growth-rate analysis is contingent on the weekly sequencing  
130 results and publicly available sequences from other sequencing centres in Kenya. The  
131 growth model takes newly identified and emerging SARS-CoV-2 lineages in Kenya and  
132 compares their frequency and growth rates to those observed in other countries from  
133 Africa, North and South America, Europe, and Oceania. Text files containing the weekly  
134 frequency of summarized SARS-CoV-2 lineages in Kenya and the stated regions are used as  
135 input into the model which then estimates lineage growth rates. Lineages showing  
136 consistent increase in abundance for at least two consecutive weeks in Kenya and/or any of  
137 the regions/country will be flagged as a cautionary signal in red. We used this to include an  
138 early warning system which can effectively be used to signal rising cases of lineages and be  
139 used to facilitate decision making at national and sub-national levels.

140

## 141 **Serosurveillance data**

142 Other surveillance studies, such as seroprevalence studies (10–12) provided serology  
143 datasets that informed the level of COVID-19 infection within the population in the early  
144 phases of the pandemic in different study populations.

145

## 146 **Adult syndromic surveillance data**

147 In addition, countrywide datasets from the Adult Syndromic Surveillance work were added  
148 to provide a disease situational awareness which is important in national pandemic  
149 preparedness plans. This is achieved through a hospital-based surveillance program set up  
150 as part of national response to COVID-19 in Kenya. The initiative collects daily clinical data  
151 from adults admitted in medical wards in at least 15 health facilities in Central, Coast and  
152 Western regions of Kenya.

153

## 154 **Kenya COVID-19 Dashboard Architecture**

### 155 **Framework and data integration**

156 The Kenya COVID-19 dashboard was prototyped using the Dash Python framework, an  
157 open-source and freely accessible web framework written on top of Flask, Plotly and React  
158 frameworks. The source code is written in Python (v3.10) language and the dashboard is  
159 hosted on an Apache (v2.4) web server running on a Linux environment (Ubuntu v22.04).

160

161 Tabular spreadsheets served as input data files that were continuously updated weekly and  
162 monthly, Supplementary table 1. In the backend, Pandas and NumPy python libraries were  
163 used in parsing and processing of the data files. The front end is implemented using the  
164 Plotly Dash package (Plotly Technologies Inc. 2015, <https://plotly.com/python/>) to structure  
165 and display pages, handling user callbacks and visualize the data (figure 2).

166

167 Prior to being visualized in the dashboard, the datasets undergo rigorous preprocessing  
168 steps to clean, transform, and validate the raw data and ensure accuracy and completeness.  
169 Cleaning process involved identifying and correcting wrong date formats, value mislabelling  
170 (i.e count and sub-county names and hospital names). Aggregated summaries for different  
171 patient age categories, counties, and temporal were performed on the linelist datasets.  
172 Similarly obtained serosurveillance and syndromic surveillance datasets were summarized  
173 and visualized by region, gender, age categories and study populations.

174

175 Estimates from the Bayesian growth rate analysis (8) are calculated separately using R  
176 (version 4.4.2) and we used this to include an early warning system that was relevant in  
177 informing increase in cases. The resulting data is rendered using plotly graph package in the

178 dashboard. Any newly identified SARS-CoV-2 lineages observed in Kenya are updated in the  
179 model dataset and subsequently an update of the growth rate estimation results.

180

181 The phylogeny tab uses Nextstrain genomics pipeline (9) to generate phylogenetic  
182 relationships for SARS-CoV-2 lineages identified on samples collected within Kenya. The  
183 generated analyses configuration files (<https://github.com/veclab/ncov-kenya>) are shared  
184 through the Nextstrain community URLs (<https://nextstrain.org/community>) and mapped  
185 onto the dashboard. The use of open-source tools and the availability of the associated  
186 COVID-19 dataset allowed rapid customization of the platform. The source code is placed in  
187 a GitHub repository and can be accessed online ([https://github.com/mikemwanga/Kenya-](https://github.com/mikemwanga/Kenya-COVID-19-Dashboard)  
188 [COVID-19-Dashboard](https://github.com/mikemwanga/Kenya-COVID-19-Dashboard)). The dashboard is maintained by KWTRP and can be accessed via this  
189 link: <https://kcd.kemri-wellcome.org/>.

190

### 191 **Dashboard Pages**

192 The beta version of the multi-page dashboard is currently running and displays data reports  
193 on COVID-19 surveillance and monitoring in Kenya. The dashboard is tabbed with multiple  
194 pages, i.e., home, county, seroprevalence, vaccination, syndromic-surveillance, variants, and  
195 phylogeny.

196

197 The home page provides a summary of the most recent data on the total number of cases,  
198 and tests carried out, SARS-CoV-2 positivity, deaths, and recoveries reported since the  
199 beginning of the pandemic. This page also displays the number of cases, deaths, tests done,  
200 and positivity in a span of 24-hour period as reported by MOH-K. Additionally, graphical  
201 displays indicating counties with reported cases in the last 24 hours, a breakdown of the  
202 counties with reported cases the countrywide epidemiological curve of cases and fatalities,  
203 and cases and deaths in different age groups and gender categories are described.

204

205 The county page is designed to allow visualization of COVID-19 epidemiology at the sub-  
206 national level. Users interactively filter by county of interest and view the selected county's  
207 total cases, total fatalities, and overall positivity. Additionally, graphs showing temporal  
208 daily trends in cases, and cumulative cases are displayed. The vaccination page overviews

209 reported metrics of the number of persons vaccinated countrywide and percentage per  
210 county.

211

212 The seroprevalence page uses data from the serological studies conducted among different  
213 populations since the beginning of the pandemic. The users can interactively compare the  
214 change in seroprevalence between populations and on demography such as age, gender,  
215 and geographical location.

216

217 The Adult syndromic surveillance section provides a detailed summary of information  
218 captured from patient record files obtained from collaborating health facilities across the  
219 country. This section includes detailed information on patient demographics categorized by  
220 region and admission period, as well as symptoms and conducted tests during admission.  
221 Additionally, the section encompasses documentation of critical priority indicators and  
222 measures, such as COVID-19 vaccination status, HIV status, and recording of vital signs like  
223 temperature, blood pressure, and respiration rate.

224

225 The variant trends page seeks to understand temporal trends and variations of circulating  
226 SARS-CoV-2 variants and lineages. Here, temporal prevalence data for the most recent  
227 circulating SARS-COV-2 lineages across the country is also viewed. Furthermore, results of  
228 the growth rate model for warnings on lineages of concern are also displayed in this page.  
229 The phylogeny tab allows phylogenetic tree visualization of SARS-CoV-2 lineages using  
230 Nextstrain bioinformatics pipeline for phylodynamic analysis and interactive visualization.  
231 The nextstrain platform is used to analyse and compare lineages observed locally against a  
232 background dataset of local and global lineages. The availability of county metadata enables  
233 an understanding of lineage diversity at both national and subnational levels.

234

### 235 **Significance**

236 The Kenya COVID-19 dashboard was completed and deployed by August 2023. By the time  
237 of writing, the platform reported over 344,000 COVID-19 cases, 5689 deaths and an overall  
238 positivity of 8.6% by December 2023. Cases were most reported in individuals between ages  
239 21-40 in both male and female, while high fatalities was experienced in adults between 61-  
240 70 years of age. COVID-19 cases were most prevalent in Nairobi (41.3%), Kiambu (6.27%),



241 Mombasa (5.38%), Nakuru (5.2%) and Uasin Gishu (3.21%) counties. The rate of infection  
242 was highest in Nairobi County where at least 3.18% of the population were infected, while  
243 the in the rest, >1% of the population were infected.

244

245 Vaccination data from MoH-K shows that only 63% of the over 29 million received doses  
246 were administered and that 37.2% of the Kenyan population are fully vaccinated.  
247 Vaccination with first and second doses was high in persons of ages between 18-29 and 30-  
248 39 years while most of the partially vaccinated persons were of ages between 15-18 years.  
249 At county levels, over 50% of Nairobi (56.3%), Nyeri (54.3%), Siaya (52.2%) and Kisumu  
250 (51.2%) residents had been fully vaccinated. In contrast the least vaccinated populations  
251 were from Mandera (10.6%), Wajir (11.2%), Tana River (11.7%), Isiolo (13.6%), Marsabit  
252 (14.1%) and Garissa (14.4%) counties.

253

254 Sero-surveillance data shows significantly high (93.4%) seroprevalence by December 2022 as  
255 demonstrated by high anti-S IgG levels within the Health Demographic System Surveillance  
256 (HDSS) residents. The anti-S IgG levels were significantly lower (4.5%)\_in the initial phases  
257 of the pandemic as observed in studies done on blood donors between December 202 to  
258 April 2021.

259

260 By end of December 2023, syndromic surveillance analysis was performed on 25,709  
261 admitted in multiple health facilities from Western, Central and Coastal regions.  
262 Documentation of respiratory rate, heart rate and blood pressure improved from April 2023  
263 to December 2023 where 100% of all patients had these measures recorded. In contrast,  
264 less than 70% of the patients had their body temperature and heart rate recorded and less  
265 than 30% of patient's had their height and weight recorded. There was variation in  
266 documentation of patient's HIV status (36 to 70.1%) and COVID-19 (2.9% to 54.5%)  
267 vaccination between January to December 2023.

268

269 Towards the end of 2023, over 12,000 SARS-CoV-2 sequences from Kenya had been  
270 submitted to the GISAID platform. We summarised this data to provide and overview of  
271 temporal diversity of SARS-COV-2 variants and lineages. Generally, the dominance of non-  
272 variants of concern between March 2020 to January 2021, was replaced by co-circulation of

273 alpha, beta, eta and delta variants of concern between January to November 2021. Since  
274 then, the omicron variant has dominated to December 2023. Diverse lineages of the  
275 omicron variant have co-circulated in 2023 with dominance of the FY.4.1-like and GE.1-like  
276 lineages.

277

278

## 279 Discussion

280

281 Control and management of emerging infectious disease outbreaks require appropriate  
282 responses through optimal disease surveillance, monitoring, and timely outbreak detection  
283 which will inform among other things, the affected population, disease prevalence, and  
284 pathogen dynamics. Successful responses and outbreak management require the  
285 exploitation of all available data from a variety of disciplines to inform response in real-time  
286 and allow evidence-based decision-making. Continued use of conventional and traditional  
287 approaches have proved less effective in controlling such crisis hence the aspiration to  
288 integrate and utilize information technology systems such as dashboard in monitoring and  
289 tracking disease progression.

290

291 The Kenya COVID-19 dashboard provides a one-stop digital site to view up-to-date daily and  
292 long-term summaries of COVID-19 disease and can be used to develop intervention plans.  
293 We demonstrate the significance of integrating multiple datasets from a disease outbreak to  
294 support monitoring and enhance intervention measures. This is the first detailed interactive  
295 COVID-19 platform in Kenya that combines genomics, epidemiological, seroprevalence,  
296 modelling, vaccination, syndromic and phylogenetic data and provides real-time updates to  
297 the public and health sector experts. The dashboard provides simple and clear graphics to  
298 the users and allows interaction and customization of visuals. The dashboard makes  
299 complex genomics and epidemiological data accessible to a wider audience and can be used  
300 to inform public health policy and guide public health responses in Kenya. Making such  
301 visualization tools accessible to all partners and the public reduces time spent on other  
302 reports and routine data analysis. We demonstrate that it is possible to develop a ready-to-  
303 use and easy-to-setup online visualization dashboard using open-source tools that can serve  
304 as a platform for surveillance and monitoring of infectious diseases for outbreak response  
305 and interventions.

306

307 COVID-19 pandemic emphasized utilization of dashboards to track disease and be an  
308 integral part of public health disease surveillance and response efforts. During the unfolding  
309 of the pandemic, many countries struggled to make data publicly available and only few  
310 dashboards such as the Johns Hopkins University COVID Tracker became the to go for daily

311 cases, deaths, tests among other metrics (5). Overtime, national and subnational  
312 dashboards have been developed to assist state agencies in managing the pandemic and  
313 expounding further to monitoring infectious pathogens. For instance, the United Kingdom  
314 Health Surveillance data dashboard was initially designed to report on COVID-19 pandemic  
315 but has further integrated other respiratory pathogens and seasonal influenza (13). The  
316 developed Kenya COVID-19 dashboard not only informs on COVID-19 disease trends but  
317 also on other COVID-19 related datasets such as variant diversity and seroprevalence. This  
318 signifies the importance of dashboards in providing key insights to researchers, health policy  
319 makers and public not only during pandemics but also during routine surveillance.

320

### 321 **Strengths and Limitations**

322 The development and deployment of this dashboard uses free open-source tools and  
323 software and simple data techniques to achieve its aims. Python programme based free  
324 libraries such as pandas, NumPy, and plotly dash have been used to process, and render  
325 summary plots in this platform. This is a user-friendly and intuitive platform that is publicly  
326 and globally accessible with interactive features that allow users to select and compare data  
327 up to subnational levels. Furthermore, unlike most of other COVID-19 dashboard,  
328 integrating and displaying trends from multi-disciplinary sources namely case data, genomic,  
329 vaccination and seroprevalence allows conclusive understanding of disease outbreak.

330

331 On the downside, at the time of writing, there is reduced interest in COVID-19 disease by  
332 the target groups including public and policy makers; hence there is need to engage  
333 stakeholders and relevant authorities on significance of such platforms for future pandemic  
334 preparations. Additionally, the decline in COVID-19 prevalence has reduced data collection  
335 hence 'slowness' in updating the platform.

336

### 337 **Acknowledgment**

338 We thank the Ministry of Health Kenya, and National Public Health Laboratories (Kenya), for  
339 sharing COVID-19 datasets. We thank members of the Pathogen Epidemiology and Omics  
340 group (PEO) and KEMRI Wellcome Trust Research Programme for their contribution to this  
341 work.

342

343

344 **Funding**

345 This work was supported by funds received from the UK Foreign Commonwealth and  
346 Development Office (FCDO) through the East Africa Research Fund and Wellcome Trust  
347 (grant 220985/Z/20/Z. This work is part of an integrated programme of SARS-CoV-2 sero-  
348 surveillance in Kenya led by KEMRI Wellcome Trust Research Programme.

349

350 **Code and Data Availability**

351 The source code for the dashboard is placed in a GitHub repository and can be accessed  
352 online (<https://github.com/mikemwanga/Kenya-COVID-19-Dashboard>). Users who wish to  
353 access and use the data should send a request to the KEMRI Wellcome Trust Research  
354 Programme data governance committee, which can be contacted by emailing: [dgc@kemri-](mailto:dgc@kemri-wellcome.org)  
355 [wellcome.org](mailto:dgc@kemri-wellcome.org).

356

357 **Conflicts of Interest**

358 All authors declare no conflict of interest.

359

360

361

362

363

364

365

366

367

368

369

370

371

372

373

374

375

376

377

378

379

380

381

382  
383  
384  
385  
386  
387  
388  
389  
390

## References

- 391 1. [Addai BW, Ngwa W. COVID-19 and cancer in Africa \[Internet\]. Vol. 371, Science.](#)  
392 [American Association for the Advancement of Science; 2021 \[cited 2024 Feb 2\]. p.](#)  
393 [25–7. Available from: https://www.science.org/doi/10.1126/science.abd1016](#)
- 394 2. Herman-Roloff A, Aman R, Samandari T, Kasera K, Emukule G, Amoth P, et al.  
395 Adapting Longstanding Public Health Collaborations between Government of Kenya  
396 and CDC Kenya in Response to the COVID-19 Pandemic, 2020-2021. *Emerg Infect Dis*  
397 [Internet]. 2022 Dec 1 [cited 2024 Feb 2];28(13):S159–67. Available from:  
398 [https://wwwnc.cdc.gov/eid/article/28/13/21-1550\\_article](https://wwwnc.cdc.gov/eid/article/28/13/21-1550_article)
- 399 3. Khodaveisi T, Dehdarirad H, Bouraghi H, Mohammadpour A, Sajadi F, Hosseiniravandi  
400 M. Characteristics and specifications of dashboards developed for the COVID-19  
401 pandemic: a scoping review [Internet]. *Journal of Public Health (Germany)*. Institute  
402 for Ionics; 2023 [cited 2024 Feb 2]. Available from:  
403 <https://link.springer.com/article/10.1007/s10389-023-01838-z>
- 404 4. Kamadjeu R, Gathenji C. Designing and implementing an electronic dashboard for  
405 disease outbreaks response - Case study of the 2013-2014 Somalia Polio outbreak  
406 response dashboard. *Pan Afr Med J* [Internet]. 2017 [cited 2023 Apr 13];27(Suppl 3).  
407 Available from: <https://pubmed.ncbi.nlm.nih.gov/29296157/>
- 408 5. Dong E, Ratcliff J, Goyea TD, Katz A, Lau R, Ng TK, et al. The Johns Hopkins University  
409 Center for Systems Science and Engineering COVID-19 Dashboard: data collection  
410 process, challenges faced, and lessons learned. *Lancet Infect Dis* [Internet]. 2022 Dec  
411 1 [cited 2023 Apr 13];22(12):e370–6. Available from:  
412 <https://pubmed.ncbi.nlm.nih.gov/36057267/>
- 413 6. WHO. WHO Coronavirus (COVID-19) Dashboard | WHO Coronavirus (COVID-19)  
414 Dashboard With Vaccination Data [Internet]. 2022 [cited 2023 Apr 13]. Available  
415 from: <https://covid19.who.int/>

- 416 7. CDC. CDC . (2020). COVID-19 dashboard [Internet]. 2020 [cited 2023 Apr 13].  
417 Available from: <https://africacdc.org/covid-19/>
- 418 8. Guzmán-Rincón LM, Hill EM, Dyson L, Tildesley MJ, Keeling MJ. Bayesian estimation of  
419 real-time epidemic growth rates using Gaussian processes: local dynamics of SARS-  
420 CoV-2 in England. *J R Stat Soc Ser C Appl Stat* [Internet]. 2023 Jun 27 [cited 2023 Aug  
421 10]; Available from: <https://doi.org/10.1093/jrsssc/qlad056>
- 422 9. Hadfield J, Megill C, Bell SM, Huddleston J, Potter B, Callender C, et al. Nextstrain:  
423 real-time tracking of pathogen evolution. [cited 2023 Apr 11]; Available from:  
424 [www.ncbi.nlm.nih.gov](http://www.ncbi.nlm.nih.gov)
- 425 10. Adetifa IMO, Uyoga S, Gitonga JN, Mugo D, Otiende M, Nyagwange J, et al. Temporal  
426 trends of SARS-CoV-2 seroprevalence during the first wave of the COVID-19 epidemic  
427 in Kenya. *Nature Communications* 2021 12:1 [Internet]. 2021 Jun 25 [cited 2023 Apr  
428 13];12(1):1–6. Available from: <https://www.nature.com/articles/s41467-021-24062-3>
- 429 11. Kagucia EW, Gitonga JN, Kalu C, Ochomo E, Ochieng B, Kuya N, et al. Anti-Severe  
430 Acute Respiratory Syndrome Coronavirus 2 Immunoglobulin G Antibody  
431 Seroprevalence Among Truck Drivers and Assistants in Kenya. *Open Forum Infect Dis*  
432 [Internet]. 2021 Jul 1 [cited 2023 Apr 13];8(7). Available from:  
433 <https://pubmed.ncbi.nlm.nih.gov/34660838/>
- 434 12. Etyang AO, Lucinde R, Karanja H, Kalu C, Mugo D, Nyagwange J, et al. Seroprevalence  
435 of Antibodies to Severe Acute Respiratory Syndrome Coronavirus 2 Among  
436 Healthcare Workers in Kenya. *Clin Infect Dis* [Internet]. 2022 Jan 15 [cited 2023 Apr  
437 13];74(2):288–93. Available from: <https://pubmed.ncbi.nlm.nih.gov/33893491/>
- 438 13. United Kingdom Health Surveillance data dashboard. Available from: [https://ukhsa-](https://ukhsa-dashboard.data.gov.uk/)  
439 [dashboard.data.gov.uk/](https://ukhsa-dashboard.data.gov.uk/)

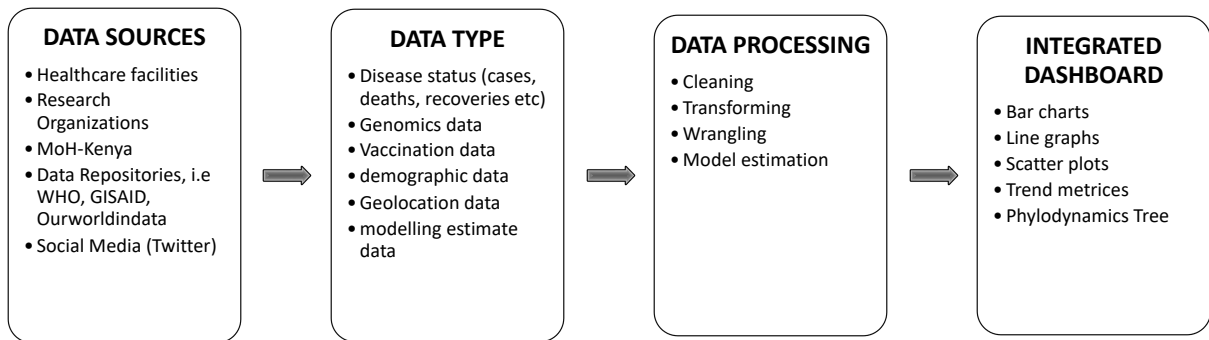

Figure 1: Schematic presentation of data workflow and processing stages and integration to the dashboard.



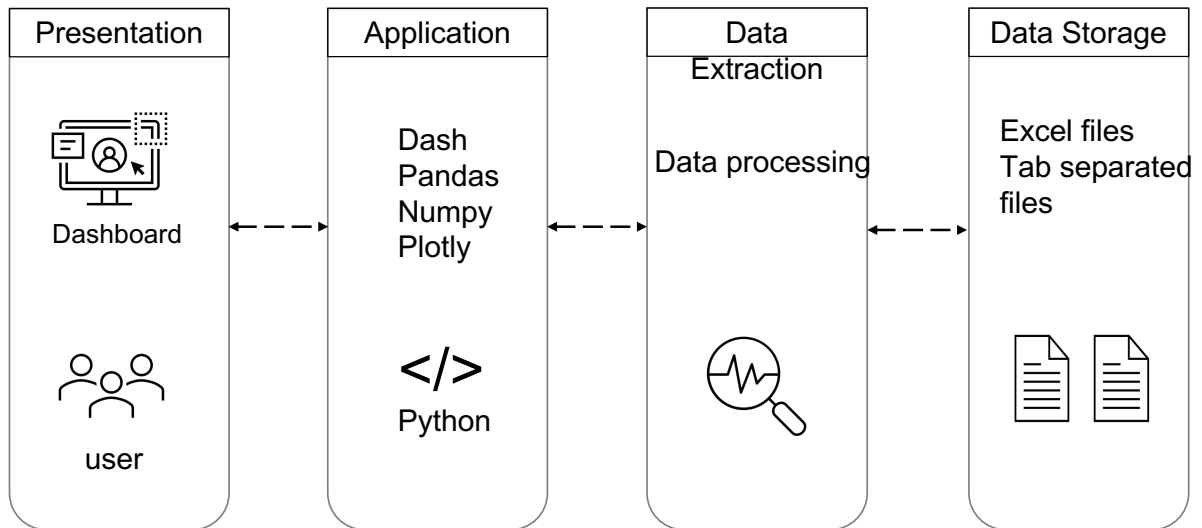

**Figure 2:** Illustration of the Kenya COVID-19 dashboard architecture from backend to frontend. When users select on components on the dashboard, python libraries are utilized to query and extract the dataset from stored files, generate visuals that are then displayed on the users' screen.
